# Supplementary material
Source: publisher figshare collection journal article supplement (https://plos.figshare.com/articles/dataset/_/6098192)
Supplement: Supplementary file [file 1]

**S1 File. Descriptive of the sample.**

Table 1. Descriptive data (main sample)

| Descriptives (Main Sample) |         |        |          |                |            |                                  |             |         |          |
|----------------------------|---------|--------|----------|----------------|------------|----------------------------------|-------------|---------|----------|
|                            |         | N      | Mean     | Std. Deviation | Std. Error | 95% Confidence Interval for Mean |             | Minimum | Maximum  |
|                            | Age (y) |        |          |                |            | Lower Bound                      | Upper Bound |         |          |
| Weight (kg)                | 12.00   | 39.00  | 47.54    | 13.21          | 2.12       | 43.26                            | 51.82       | 30.50   | 86.00    |
|                            | 13.00   | 41.00  | 52.33    | 11.38          | 1.78       | 48.74                            | 55.92       | 33.70   | 84.40    |
|                            | 14.00   | 80.00  | 59.22    | 13.24          | 1.48       | 56.28                            | 62.17       | 29.70   | 116.00   |
|                            | 15.00   | 67.00  | 61.82    | 8.97           | 1.10       | 59.63                            | 64.01       | 42.40   | 84.80    |
|                            | 16.00   | 72.00  | 63.67    | 9.44           | 1.11       | 61.45                            | 65.89       | 44.90   | 104.60   |
|                            | 17.00   | 75.00  | 68.78    | 10.06          | 1.15       | 66.49                            | 71.06       | 47.50   | 100.60   |
|                            | Total   | 374.00 | 60.48    | 12.72          | 0.66       | 59.24                            | 61.82       | 29.70   | 116.00   |
| Height (m)                 | 12.00   | 39.00  | 1.52     | 0.08           | 0.01       | 1.49                             | 1.54        | 1.35    | 1.70     |
|                            | 13.00   | 41.00  | 1.61     | 0.08           | 0.01       | 1.58                             | 1.63        | 1.47    | 1.76     |
|                            | 14.00   | 80.00  | 1.67     | 0.08           | 0.01       | 1.66                             | 1.69        | 1.44    | 1.89     |
|                            | 15.00   | 67.00  | 1.71     | 0.05           | 0.01       | 1.70                             | 1.72        | 1.60    | 1.83     |
|                            | 16.00   | 72.00  | 1.74     | 0.07           | 0.01       | 1.72                             | 1.75        | 1.60    | 1.98     |
|                            | 17.00   | 75.00  | 1.75     | 0.06           | 0.01       | 1.73                             | 1.76        | 1.62    | 1.93     |
|                            | Total   | 374.00 | 1.68     | 0.10           | 0.01       | 1.67                             | 1.69        | 1.35    | 1.98     |
| Body Mass Index(kg/m²)     | 12.00   | 39.00  | 20.55    | 4.95           | 0.79       | 18.95                            | 22.15       | 14.85   | 37.22    |
|                            | 13.00   | 41.00  | 20.04    | 3.21           | 0.50       | 19.03                            | 21.05       | 15.24   | 32.56    |
|                            | 14.00   | 80.00  | 21.02    | 3.61           | 0.40       | 20.22                            | 21.82       | 14.32   | 35.80    |
|                            | 15.00   | 67.00  | 21.10    | 2.49           | 0.30       | 20.49                            | 21.71       | 16.38   | 28.33    |
|                            | 16.00   | 72.00  | 21.10    | 2.70           | 0.32       | 20.47                            | 21.74       | 15.83   | 31.93    |
|                            | 17.00   | 75.00  | 23.09    | 6.50           | 0.31       | 21.85                            | 23.09       | 16.44   | 31.18    |
|                            | Total   | 374.00 | 21.19    | 4.26           | 0.17       | 20.86                            | 21.53       | 14.32   | 37.22    |
| Wait Circunference (cm)    | 12.00   | 39.00  | 67.91    | 9.59           | 1.58       | 64.72                            | 71.11       | 55.20   | 89.60    |
|                            | 13.00   | 41.00  | 68.87    | 8.55           | 1.35       | 66.13                            | 71.60       | 57.00   | 99.50    |
|                            | 14.00   | 80.00  | 70.08    | 7.67           | 0.86       | 68.38                            | 71.79       | 55.70   | 97.00    |
|                            | 15.00   | 67.00  | 70.97    | 5.61           | 0.69       | 69.59                            | 72.35       | 58.90   | 88.00    |
|                            | 16.00   | 72.00  | 71.45    | 6.11           | 0.72       | 70.01                            | 72.89       | 57.00   | 90.90    |
|                            | 17.00   | 75.00  | 75.24    | 7.36           | 0.84       | 73.58                            | 76.92       | 62.30   | 103.60   |
|                            | Total   | 374.00 | 71.20    | 7.65           | 0.40       | 70.45                            | 72.01       | 55.20   | 103.60   |
| Body Fat (%)               | 12.00   | 39.00  | 27.69    | 7.49           | 1.20       | 25.27                            | 30.12       | 16.50   | 43.40    |
|                            | 13.00   | 41.00  | 23.75    | 5.70           | 0.89       | 21.96                            | 25.55       | 16.00   | 42.20    |
|                            | 14.00   | 80.00  | 20.03    | 4.85           | 0.54       | 18.95                            | 21.11       | 15.10   | 40.20    |
|                            | 15.00   | 67.00  | 19.33    | 4.26           | 0.52       | 18.29                            | 20.37       | 13.90   | 37.40    |
|                            | 16.00   | 72.00  | 18.06    | 4.31           | 0.51       | 17.05                            | 19.07       | 13.60   | 39.60    |
|                            | 17.00   | 75.00  | 19.51    | 4.82           | 0.55       | 18.30                            | 20.49       | 13.50   | 35.30    |
|                            | Total   | 374.00 | 20.63    | 5.81           | 0.30       | 20.01                            | 21.19       | 13.50   | 43.40    |
| Fat Mass (g)               | 12.00   | 39.00  | 14536.63 | 6981.06        | 1180.01    | 12138.55                         | 16934.70    | 6039.00 | 28510.00 |
|                            | 13.00   | 41.00  | 13021.67 | 5562.94        | 890.78     | 11218.37                         | 14824.96    | 6891.00 | 31050.00 |
|                            | 14.00   | 80.00  | 12750.80 | 6929.70        | 794.89     | 11167.30                         | 14334.31    | 6806.00 | 47491.00 |
|                            | 15.00   | 67.00  | 13243.70 | 6777.64        | 847.20     | 11550.70                         | 14936.71    | 6958.00 | 45610.00 |
|                            | 16.00   | 72.00  | 12323.25 | 4707.01        | 575.05     | 11175.12                         | 13471.38    | 6460.00 | 36196.00 |
|                            | 17.00   | 75.00  | 14830.16 | 8365.19        | 959.55     | 12918.63                         | 16741.69    | 7474.00 | 55068.00 |
|                            | Total   | 374.00 | 13406.26 | 6778.30        | 358.75     | 12700.73                         | 14111.79    | 6039.00 | 55068.00 |

Table 2. Descriptive data (validation sample)

| Descriptives (Validation Sample)       |       |       |          |                   |               |                                     |                |         |          |
|----------------------------------------|-------|-------|----------|-------------------|---------------|-------------------------------------|----------------|---------|----------|
|                                        |       | N     | Mean     | Std.<br>Deviation | Std.<br>Error | 95% Confidence<br>Interval for Mean |                | Minimum | Maximum  |
|                                        | Age   |       |          |                   |               | Lower<br>Bound                      | Upper<br>Bound |         |          |
| Weight (kg)                            | 12.00 | 4.00  | 44.15    | 6.33              | 3.17          | 34.07                               | 54.23          | 35.00   | 48.40    |
|                                        | 13.00 | 5.00  | 58.50    | 8.47              | 3.79          | 47.98                               | 69.02          | 51.60   | 72.30    |
|                                        | 14.00 | 9.00  | 60.63    | 7.44              | 2.48          | 54.91                               | 66.35          | 53.70   | 78.50    |
|                                        | 15.00 | 8.00  | 59.54    | 8.98              | 3.17          | 52.03                               | 67.04          | 51.60   | 78.30    |
|                                        | 16.00 | 8.00  | 56.25    | 4.71              | 1.67          | 52.31                               | 60.19          | 48.90   | 63.40    |
|                                        | 17.00 | 8.00  | 66.39    | 14.86             | 5.25          | 53.97                               | 78.81          | 48.40   | 91.40    |
|                                        | Total | 42.00 | 58.86    | 10.50             | 1.62          | 55.59                               | 62.13          | 35.00   | 91.40    |
| Height (m)                             | 12.00 | 4.00  | 1.49     | 0.04              | 0.02          | 1.42                                | 1.56           | 1.46    | 1.55     |
|                                        | 13.00 | 5.00  | 1.68     | 0.06              | 0.02          | 1.61                                | 1.75           | 1.65    | 1.78     |
|                                        | 14.00 | 9.00  | 1.69     | 0.04              | 0.01          | 1.66                                | 1.72           | 1.63    | 1.74     |
|                                        | 15.00 | 8.00  | 1.73     | 0.05              | 0.02          | 1.69                                | 1.77           | 1.66    | 1.79     |
|                                        | 16.00 | 8.00  | 1.71     | 0.06              | 0.02          | 1.66                                | 1.76           | 1.64    | 1.79     |
|                                        | 17.00 | 8.00  | 1.72     | 0.07              | 0.02          | 1.67                                | 1.78           | 1.62    | 1.82     |
|                                        | Total | 42.00 | 1.69     | 0.08              | 0.01          | 1.66                                | 1.71           | 1.46    | 1.82     |
| Body Mass<br>Index(kg/m <sup>2</sup> ) | 12.00 | 4.00  | 19.93    | 2.52              | 1.26          | 15.92                               | 23.93          | 16.40   | 22.25    |
|                                        | 13.00 | 5.00  | 20.63    | 1.79              | 0.80          | 18.42                               | 22.85          | 18.73   | 22.95    |
|                                        | 14.00 | 9.00  | 21.22    | 2.53              | 0.84          | 19.28                               | 23.16          | 18.93   | 26.69    |
|                                        | 15.00 | 8.00  | 19.84    | 2.83              | 1.00          | 17.47                               | 22.21          | 17.25   | 26.16    |
|                                        | 16.00 | 8.00  | 19.35    | 1.89              | 0.67          | 17.77                               | 20.93          | 15.77   | 22.20    |
|                                        | 17.00 | 8.00  | 22.17    | 3.66              | 1.29          | 19.11                               | 25.23          | 18.44   | 27.59    |
|                                        | Total | 42.00 | 20.59    | 2.70              | 0.42          | 19.75                               | 21.43          | 15.77   | 27.59    |
| Wait<br>Circunference<br>(cm)          | 12.00 | 4.00  | 66.20    | 5.37              | 2.69          | 57.65                               | 74.75          | 59.90   | 72.90    |
|                                        | 13.00 | 5.00  | 69.86    | 3.90              | 1.74          | 65.02                               | 74.70          | 67.00   | 76.10    |
|                                        | 14.00 | 9.00  | 72.50    | 5.91              | 1.97          | 67.96                               | 77.04          | 65.90   | 86.00    |
|                                        | 15.00 | 8.00  | 69.83    | 4.47              | 1.58          | 66.09                               | 73.56          | 64.80   | 80.00    |
|                                        | 16.00 | 8.00  | 66.56    | 5.45              | 1.93          | 62.00                               | 71.12          | 56.50   | 73.20    |
|                                        | 17.00 | 8.00  | 75.83    | 7.85              | 2.78          | 69.26                               | 82.39          | 65.50   | 86.50    |
|                                        | Total | 42.00 | 70.58    | 6.39              | 0.99          | 68.59                               | 72.57          | 56.50   | 86.50    |
| Body Fat (%)                           | 12.00 | 4.00  | 31.53    | 4.00              | 2.00          | 25.16                               | 37.89          | 25.70   | 34.80    |
|                                        | 13.00 | 5.00  | 19.78    | 4.04              | 1.81          | 14.76                               | 24.80          | 15.60   | 24.90    |
|                                        | 14.00 | 9.00  | 21.01    | 7.40              | 2.47          | 15.32                               | 26.70          | 14.10   | 36.80    |
|                                        | 15.00 | 8.00  | 17.88    | 2.17              | 0.77          | 16.06                               | 19.69          | 15.60   | 22.00    |
|                                        | 16.00 | 8.00  | 17.89    | 1.27              | 0.45          | 16.82                               | 18.95          | 15.60   | 20.00    |
|                                        | 17.00 | 8.00  | 18.98    | 4.83              | 1.71          | 14.94                               | 23.01          | 14.20   | 29.10    |
|                                        | Total | 42.00 | 20.29    | 5.79              | 0.89          | 18.48                               | 22.09          | 14.10   | 36.80    |
| Fat Mass (g)                           | 12.00 | 4.00  | 14267.00 | 3740.69           | 1870.34       | 8314.73                             | 20219.27       | 8788.00 | 16869.00 |
|                                        | 13.00 | 5.00  | 11614.40 | 3066.31           | 1371.29       | 7807.08                             | 15421.72       | 7793.00 | 15245.00 |
|                                        | 14.00 | 9.00  | 13030.75 | 5993.61           | 2119.06       | 8019.97                             | 18041.53       | 8520.00 | 23486.00 |
|                                        | 15.00 | 8.00  | 11857.38 | 5624.87           | 1988.69       | 7154.87                             | 16559.88       | 8861.00 | 25621.00 |
|                                        | 16.00 | 8.00  | 10547.75 | 1640.00           | 579.83        | 9176.67                             | 11918.83       | 8684.00 | 14294.00 |
|                                        | 17.00 | 8.00  | 15615.00 | 7033.17           | 2486.60       | 9735.12                             | 21494.88       | 7244.00 | 26494.00 |
|                                        | Total | 42.00 | 12769.44 | 5110.57           | 798.14        | 11156.34                            | 14382.53       | 7244.00 | 26494.00 |

Table 3. Descriptive data of skinfold thickness (n=374)

## Descriptive Skinfold Thickness (N = 374)

| Age (years) |                 | TR (mm)          | SB (mm)           | AB (mm)            | SI (mm)           | TH (mm)           | MA (mm)           | CH (mm)           | BI (mm)          | CF (mm)           |
|-------------|-----------------|------------------|-------------------|--------------------|-------------------|-------------------|-------------------|-------------------|------------------|-------------------|
| 12          | Mean $\pm$ SD   | 16.36 $\pm$ 8.21 | 15.82 $\pm$ 10.96 | 24.78 $\pm$ 17.37  | 17.72 $\pm$ 14.43 | 24.79 $\pm$ 12.08 | 13.70 $\pm$ 9.39  | 15.74 $\pm$ 11.00 | 10.09 $\pm$ 5.85 | 16.59 $\pm$ 8.13  |
|             | Median $\pm$ IA | 13.60 $\pm$ 10.0 | 11.30 $\pm$ 14.60 | 23.10 $\pm$ 20.90  | 12.9 $\pm$ 16.10  | 20.90 $\pm$ 10.80 | 11.50 $\pm$ 12.90 | 11.50 $\pm$ 17.80 | 7.60 $\pm$ 9.70  | 14.90 $\pm$ 10.30 |
| 13          | Mean $\pm$ SD   | 12.34 $\pm$ 5.81 | 11.69 $\pm$ 7.81  | 17.80 $\pm$ 11.62  | 12.17 $\pm$ 8.47  | 19.01 $\pm$ 9.53  | 10.45 $\pm$ 6.89  | 11.82 $\pm$ 8.04  | 7.19 $\pm$ 4.37  | 12.55 $\pm$ 5.90  |
|             | Median $\pm$ IA | 11.15 $\pm$ 5.93 | 9.15 $\pm$ 4.20   | 15.00 $\pm$ 14.73  | 9.95 $\pm$ 9.45   | 15.85 $\pm$ 10.45 | 9.05 $\pm$ 6.83   | 9.15 $\pm$ 7.03   | 5.45 $\pm$ 3.78  | 11.20 $\pm$ 8.83  |
| 14          | Mean $\pm$ SD   | 10.36 $\pm$ 4.62 | 10.91 $\pm$ 6.55  | 16.015 $\pm$ 11.55 | 10.51 $\pm$ 9.03  | 15.43 $\pm$ 7.31  | 9.25 $\pm$ 7.27   | 8.99 $\pm$ 5.89   | 5.56 $\pm$ 2.63  | 10.10 $\pm$ 5.33  |
|             | Median $\pm$ IA | 9.00 $\pm$ 4.55  | 8.80 $\pm$ 4.20   | 12.10 $\pm$ 9.75   | 7.40 $\pm$ 4.30   | 12.80 $\pm$ 6.45  | 6.50 $\pm$ 4.35   | 6.80 $\pm$ 3.85   | 4.60 $\pm$ 2.00  | 9.00 $\pm$ 3.30   |
| 15          | Mean $\pm$ SD   | 9.18 $\pm$ 3.90  | 10.43 $\pm$ 4.95  | 14.83 $\pm$ 9.73   | 10.01 $\pm$ 7.28  | 13.85 $\pm$ 6.40  | 8.08 $\pm$ 4.34   | 8.06 $\pm$ 4.32   | 4.83 $\pm$ 1.72  | 9.41 $\pm$ 4.69   |
|             | Median $\pm$ IA | 8.60 $\pm$ 4.00  | 9.10 $\pm$ 4.50   | 11.30 $\pm$ 8.40   | 7.30 $\pm$ 4.40   | 12.20 $\pm$ 6.70  | 6.40 $\pm$ 3.20   | 6.70 $\pm$ 3.20   | 4.30 $\pm$ 1.50  | 8.00 $\pm$ 4.70   |
| 16          | Mean $\pm$ SD   | 8.56 $\pm$ 3.76  | 10.11 $\pm$ 4.99  | 13.11 $\pm$ 8.34   | 8.90 $\pm$ 6.79   | 12.81 $\pm$ 7.05  | 7.59 $\pm$ 4.93   | 7.02 $\pm$ 3.70   | 4.52 $\pm$ 1.76  | 7.98 $\pm$ 3.68   |
|             | Median $\pm$ IA | 7.80 $\pm$ 3.65  | 8.70 $\pm$ 3.25   | 10.85 $\pm$ 5.78   | 6.80 $\pm$ 4.28   | 10.75 $\pm$ 5.43  | 6.15 $\pm$ 2.65   | 6.00 $\pm$ 2.35   | 4.10 $\pm$ 1.30  | 7.15 $\pm$ 2.68   |
| 17          | Mean $\pm$ SD   | 9.17 $\pm$ 4.63  | 11.40 $\pm$ 6.05  | 16.07 $\pm$ 10.65  | 9.91 $\pm$ 7.32   | 12.66 $\pm$ 6.26  | 8.50 $\pm$ 6.10   | 7.91 $\pm$ 4.92   | 4.61 $\pm$ 1.98  | 8.43 $\pm$ 3.88   |
|             | Median $\pm$ IA | 7.90 $\pm$ 4.05  | 9.50 $\pm$ 3.85   | 12.10 $\pm$ 9.60   | 7.00 $\pm$ 4.65   | 11.10 $\pm$ 4.40  | 6.30 $\pm$ 3.60   | 6.10 $\pm$ 3.25   | 4.10 $\pm$ 1.55  | 7.60 $\pm$ 3.25   |
| Total       | Mean $\pm$ SD   | 10.40 $\pm$ 5.47 | 11.36 $\pm$ 6.84  | 16.35 $\pm$ 11.66  | 10.92 $\pm$ 9.00  | 15.44 $\pm$ 8.61  | 9.16 $\pm$ 6.61   | 9.23 $\pm$ 6.63   | 5.68 $\pm$ 3.43  | 10.17 $\pm$ 5.69  |
|             | Median $\pm$ IA | 8.85 $\pm$ 4.90  | 9.10 $\pm$ 4.33   | 12.00 $\pm$ 10.58  | 7.40 $\pm$ 5.40   | 12.60 $\pm$ 8.53  | 6.60 $\pm$ 4.33   | 6.75 $\pm$ 4.33   | 4.60 $\pm$ 2.23  | 8.50 $\pm$ 4.90   |

Where: triceps (TR); subscapularis (SB); Abdominal (AB); Suprailiac (SI); Thigh (TH); Medium Axillary (MA); Chest (CH); Biceps (BI); Calf (CF)

Table 4. Pearson correlation with body fat percentage.

Correlations (N = 374)

|               |                     | Height | WC     | TR      | SB      | AB      | SI      | TH      | MA      | CH      | BI      | CF      | % BF (DXA) |
|---------------|---------------------|--------|--------|---------|---------|---------|---------|---------|---------|---------|---------|---------|------------|
| <b>Age</b>    | Pearson Correlation | .671** | .284** | -.346** | -.140** | -.179** | -.206** | -.370** | -.202** | -.319** | -.422** | -.406** | .027       |
|               | Sig. (2-tailed)     | .000   | .000   | .000    | .007    | .000    | .000    | .000    | .000    | .000    | .000    | .000    | .609       |
| <b>Height</b> | Pearson Correlation | 1      | .418** | -.228** | -.053   | -.051   | -.078   | -.254** | -.071   | -.177** | -.267** | -.254** | .174**     |
|               | Sig. (2-tailed)     |        | .000   | .000    | .303    | .328    | .133    | .000    | .172    | .001    | .000    | .000    | .001       |
| <b>WC</b>     | Pearson Correlation |        | 1      | .446**  | .644**  | .625**  | .608**  | .407**  | .607**  | .534**  | .426**  | .380**  | .599**     |
|               | Sig. (2-tailed)     |        |        | .000    | .000    | .000    | .000    | .000    | .000    | .000    | .000    | .000    | .000       |
| <b>TR</b>     | Pearson Correlation |        |        | 1       | .827**  | .869**  | .859**  | .913**  | .826**  | .871**  | .891**  | .893**  | .582**     |
|               | Sig. (2-tailed)     |        |        |         | .000    | .000    | .000    | .000    | .000    | .000    | .000    | .000    | .000       |
| <b>SB</b>     | Pearson Correlation |        |        |         | 1       | .896**  | .903**  | .787**  | .889**  | .877**  | .814**  | .742**  | .626**     |
|               | Sig. (2-tailed)     |        |        |         |         | .000    | .000    | .000    | .000    | .000    | .000    | .000    | .000       |
| <b>AB</b>     | Pearson Correlation |        |        |         |         | 1       | .956**  | .836**  | .906**  | .909**  | .831**  | .802**  | .652**     |
|               | Sig. (2-tailed)     |        |        |         |         |         | .000    | .000    | .000    | .000    | .000    | .000    | .000       |
| <b>SI</b>     | Pearson Correlation |        |        |         |         |         | 1       | .823**  | .938**  | .908**  | .849**  | .812**  | .627**     |
|               | Sig. (2-tailed)     |        |        |         |         |         |         | .000    | .000    | .000    | .000    | .000    | .000       |
| <b>TH</b>     | Pearson Correlation |        |        |         |         |         |         | 1       | .794**  | .839**  | .842**  | .904**  | .571**     |
|               | Sig. (2-tailed)     |        |        |         |         |         |         |         | .000    | .000    | .000    | .000    | .000       |
| <b>MA</b>     | Pearson Correlation |        |        |         |         |         |         |         | 1       | .896**  | .827**  | .761**  | .612**     |
|               | Sig. (2-tailed)     |        |        |         |         |         |         |         |         | .000    | .000    | .000    | .000       |
| <b>CH</b>     | Pearson Correlation |        |        |         |         |         |         |         |         | 1       | .910**  | .818**  | .560**     |
|               | Sig. (2-tailed)     |        |        |         |         |         |         |         |         |         | .000    | .000    | .000       |
| <b>BI</b>     | Pearson Correlation |        |        |         |         |         |         |         |         |         | 1       | .847**  | .533**     |
|               | Sig. (2-tailed)     |        |        |         |         |         |         |         |         |         |         | .000    | .000       |
| <b>CF</b>     | Pearson Correlation |        |        |         |         |         |         |         |         |         |         | 1       | .557**     |
|               | Sig. (2-tailed)     |        |        |         |         |         |         |         |         |         |         |         | .000       |

Where: triceps (TR); subscapularis (SB); Abdominal (AB); Suprailiac (SI); Thigh (TH); Medium Axillary (MA); Chest (CH); Biceps (BI); Calf (CF); Waist Circumference (WC); Body Fat Percentage (%BF)

Table 5. Paired samples test in validation sample

|        |                  | Paired Differences |                |                 |                                           |         | t    | df | Sig. (2-tailed) |
|--------|------------------|--------------------|----------------|-----------------|-------------------------------------------|---------|------|----|-----------------|
|        |                  |                    |                |                 | 95% Confidence Interval of the Difference |         |      |    |                 |
|        |                  | Mean               | Std. Deviation | Std. Error Mean | Lower                                     | Upper   |      |    |                 |
| Pair 1 | %BF - Equation 3 | .30000             | 3.25584        | .50239          | -.71459                                   | 1.31459 | .597 | 41 | .554            |
| Pair 2 | %BF - Equation 2 | .40952             | 3.19602        | .49316          | -.58643                                   | 1.40547 | .830 | 41 | .411            |
| Pair 3 | %BF - Equation 1 | .35714             | 2.81634        | .43457          | -.52049                                   | 1.23478 | .822 | 41 | .416            |

Paired Samples Statistics

|        |         | Mean    | N  | Std. Deviation | Std. Error Mean |
|--------|---------|---------|----|----------------|-----------------|
| Pair 1 | %BF DXA | 20.2857 | 42 | 5.79350        | .89396          |
|        | EQ3     | 19.9857 | 42 | 4.90423        | .75674          |
| Pair 2 | %BF DXA | 20.2857 | 42 | 5.79350        | .89396          |
|        | EQ2     | 19.8762 | 42 | 5.15652        | .79567          |
| Pair 3 | %BF DXA | 20.2857 | 42 | 5.79350        | .89396          |
|        | EQ1     | 19.9286 | 42 | 5.04237        | .77805          |

Paired Samples Correlations

|        |            | N  | Correlation | Sig. |
|--------|------------|----|-------------|------|
| Pair 1 | GDXA & EQ3 | 42 | .827        | .000 |
| Pair 2 | GDXA & EQ2 | 42 | .836        | .000 |
| Pair 3 | GDXA & EQ1 | 42 | .874        | .000 |
